# Supplementary material for: Prescriptions for the Control of a Clonal Invasive Species Using Demographic Models
Source: MDPI journal article supplement (doi:10.3390/plants11050689), 2022-03-03
Supplement: s1 [file s1]

**Table S1.** Selection of the most plausible GLM, GAMM, and GAMLSS models, predicting survival, growth, probability of reproduction, and fecundity for *Kalanchoe delagoensis*. The model selected was denoted in bold. *df*= degree freedom; AICc = Akaike Information Criterion corrected for small sample sizes; s = smooth terms; cs= cubic spline; sigma.fo= sigma.formula.

| Model                                                                                                                     | <i>df</i>  | AICc           | Models        |
|---------------------------------------------------------------------------------------------------------------------------|------------|----------------|---------------|
| <b>Survival</b> (binomial distribution)                                                                                   |            |                |               |
| <b>Survival~log(height + height<sup>2</sup>)</b>                                                                          | <b>494</b> | <b>566.70</b>  | <b>GLM</b>    |
| Survival ~ height                                                                                                         | 494        | 574.40         | GLM           |
| Survival ~ height <sup>2</sup>                                                                                            | 494        | 574.40         | GLM           |
| Survival ~s(log(height))                                                                                                  | 494        | 568.26         | GAMM          |
| Survival ~s(log(height + height <sup>2</sup> ))                                                                           | 494        | 568.65         | GLMM          |
| <b>Growth</b> (smoothing, cubic splines, normal distribution)                                                             |            |                |               |
| <b>log(height(t+1))~cs(log(height)),sigma.fo=~cs(log(height))</b>                                                         | <b>124</b> | <b>227.81</b>  | <b>GAMLSS</b> |
| log(height(t+1))~log(height),sigma.fo=~cs(log(height))                                                                    | 127        | 232.18         | GAMLSS        |
| log(height(t+1))~cs(log(height)),sigma.fo=~log(height)                                                                    | 127        | 232.18         | GAMLSS        |
| log(height(t+1))~log(height),sigma.fo=~log(height)                                                                        | 130        | 238.41         | GAMLSS        |
| log(height(t+1))~cs(log(height))                                                                                          | 128        | 250.76         | GAMLSS        |
| log(height(t+1))~log(height)                                                                                              | 131        | 254.24         | GAMLSS        |
| <b>Reproductive Probability</b> (binomial distribution)                                                                   |            |                |               |
| <b>Reproduction(t+1)~log(height)</b>                                                                                      | <b>494</b> | <b>392.50</b>  | <b>GLM</b>    |
| Reproduction(t+1)~log(height+height <sup>2</sup> )                                                                        | 494        | 393.40         | GLM           |
| Reproduction(t+1)~s(log(height))                                                                                          | 493        | 394.55         | GAMM          |
| Reproduction(t+1)~s(log(height+height <sup>2</sup> ))                                                                     | 493        | 395.40         | GAMM          |
| Reproduction(t+1)~s(height)                                                                                               | 493        | 405.10         | GAMM          |
| Reproduction(t+1)~ height                                                                                                 | 493        | 433.40         | GLM           |
| <b>Fecundity</b> (number of plantlets produced), (poisson ( <i>PO</i> ) or negative binomial distribution ( <i>NBI</i> )) |            |                |               |
| <b>plantlets ~ height (<i>NBI</i>)</b>                                                                                    | <b>269</b> | <b>2601.31</b> | <b>GAMLSS</b> |
| plantlets ~cs(log(height)) ( <i>PO</i> )                                                                                  | 267        | 11924.00       | GAMLSS        |
| plantlets ~cs(height) ( <i>PO</i> )                                                                                       | 267        | 12099.50       | GAMLSS        |
| plantlets ~log(height) ( <i>PO</i> )                                                                                      | 270        | 12292.10       | GAMLSS        |
| plantlets ~ height ( <i>PO</i> )                                                                                          | 270        | 13834.00       | GAMLSS        |
